# Supplementary material
Source: MDPI journal article supplement (https://www.mdpi.com/2073-4441/10/6/738)
Supplement: s1 [file s1]

**Supplementary Materials**

Table 1. Dry episodes occurring in the NRB and MRB according to SPEI1 and their duration, severity and peak. Sorted according to the date of occurrence. Period: 1980–2016.

| **NRB** | | | | | **MRB** | | | | |
| --- | --- | --- | --- | --- | --- | --- | --- | --- | --- |
| **Onset** | **Demise** | **Duration** | **Severity** | **Peak** | **Onset** | **Demise** | **Duration** | **Severity** | **Peak** |
| Jan-80 | Mar-80 | 3 | 3.45 | -1.85 | Dec-80 | Dec-80 | 1 | 1.04 | -1.04 |
| May-82 | Nov-82 | 7 | 6.68 | -1.62 | Jul-81 | Jul-81 | 1 | 1.21 | -1.21 |
| Jan-83 | Mar-83 | 3 | 2.50 | -1.54 | Feb-83 | Feb-83 | 1 | 1.61 | -1.61 |
| May-83 | Jul-83 | 3 | 4.78 | -2.26 | Aug-83 | Sep-83 | 2 | 1.85 | -1.21 |
| Nov-83 | Nov-83 | 1 | 1.33 | -1.33 | May-84 | Jul-84 | 3 | 2.35 | -1.19 |
| Mar-84 | Apr-84 | 2 | 1.78 | -1.30 | Jun-86 | Jul-86 | 2 | 2.08 | -1.97 |
| Jan-85 | Jun-85 | 6 | 6.41 | -2.03 | Dec-86 | Mar-87 | 4 | 4.69 | -2.18 |
| Apr-86 | May-86 | 2 | 2.62 | -1.66 | Jun-88 | Nov-88 | 6 | 8.68 | -2.03 |
| Aug-86 | Aug-86 | 1 | 1.97 | -1.97 | Feb-90 | Apr-90 | 3 | 3.45 | -1.87 |
| May-87 | Aug-87 | 4 | 3.55 | -1.01 | Oct-90 | Oct-90 | 1 | 1.07 | -1.07 |
| Feb-88 | May-88 | 4 | 3.21 | -2.01 | Jul-91 | Feb-92 | 8 | 5.86 | -1.42 |
| Mar-89 | Apr-89 | 2 | 1.45 | -1.21 | Dec-92 | Dec-92 | 1 | 1.21 | -1.21 |
| Jul-90 | Jul-90 | 1 | 1.15 | -1.15 | Feb-93 | Jul-93 | 6 | 4.41 | -1.63 |
| Jan-91 | Mar-91 | 3 | 2.76 | -1.33 | Feb-94 | Apr-94 | 3 | 1.88 | -1.07 |
| Sep-91 | Jul-92 | 11 | 12.81 | -2.27 | Jan-95 | Oct-95 | 10 | 10.85 | -2.28 |
| Sep-92 | Dec-92 | 4 | 2.19 | -1.47 | May-96 | Aug-96 | 4 | 2.49 | -1.32 |
| Dec-94 | Feb-95 | 3 | 2.58 | -1.14 | Nov-96 | Jan-97 | 3 | 2.47 | -1.03 |
| Apr-95 | May-95 | 2 | 1.66 | -1.19 | Apr-97 | Jul-97 | 4 | 2.82 | -1.56 |
| Apr-97 | Aug-97 | 5 | 4.09 | -1.70 | Jan-98 | Aug-98 | 8 | 8.56 | -2.03 |
| Oct-97 | Oct-97 | 1 | 1.96 | -1.96 | Dec-98 | Feb-99 | 3 | 1.99 | -1.17 |
| Jan-98 | Mar-98 | 3 | 3.16 | -1.33 | Jul-99 | Aug-99 | 2 | 2.40 | -1.49 |
| Oct-00 | Oct-00 | 1 | 1.13 | -1.13 | Sep-00 | Sep-00 | 1 | 1.12 | -1.12 |
| Dec-00 | Aug-01 | 9 | 6.86 | -1.33 | Apr-01 | Apr-01 | 1 | 1.42 | -1.42 |
| Oct-01 | Nov-01 | 2 | 2.16 | -1.25 | Dec-01 | Jan-02 | 2 | 1.80 | -1.09 |
| Jan-02 | Mar-02 | 3 | 2.20 | -1.03 | Sep-02 | Sep-02 | 1 | 1.18 | -1.18 |
| Jan-03 | Apr-03 | 4 | 4.02 | -1.60 | Nov-02 | Nov-02 | 1 | 1.65 | -1.65 |
| Oct-03 | Jan-04 | 4 | 3.21 | -2.02 | Apr-03 | Apr-03 | 1 | 1.37 | -1.37 |
| Jun-04 | Jun-04 | 1 | 1.00 | -1.00 | Jul-03 | Jul-03 | 1 | 1.33 | -1.33 |
| Nov-04 | Dec-04 | 2 | 3.10 | -1.78 | Nov-03 | Dec-03 | 2 | 1.96 | -1.60 |
| Aug-06 | Sep-06 | 2 | 2.73 | -1.37 | Feb-04 | May-04 | 4 | 5.28 | -1.92 |
| Nov-06 | Feb-07 | 4 | 3.85 | -2.15 | Sep-04 | Oct-04 | 2 | 1.10 | -1.08 |
| Apr-08 | Apr-08 | 1 | 1.62 | -1.62 | Mar-05 | Sep-05 | 7 | 4.00 | -1.20 |
| Aug-08 | Aug-08 | 1 | 1.16 | -1.16 | Nov-05 | Dec-05 | 2 | 2.36 | -1.41 |
| Apr-09 | May-09 | 2 | 2.55 | -1.99 | Jun-06 | Sep-06 | 4 | 2.42 | -1.29 |
| Jul-09 | Sep-09 | 3 | 3.16 | -1.49 | Jun-07 | Sep-07 | 4 | 5.23 | -2.08 |
| Nov-09 | Jan-10 | 3 | 3.18 | -1.16 | May-08 | Jul-08 | 3 | 2.04 | -1.16 |
| Jun-11 | Oct-11 | 5 | 3.37 | -1.25 | Aug-09 | Dec-09 | 5 | 2.15 | -1.26 |
| May-12 | Jun-12 | 2 | 2.09 | -1.62 | Mar-10 | Apr-10 | 2 | 2.04 | -1.85 |
| Aug-12 | Jan-13 | 6 | 5.51 | -1.51 | Jun-10 | Jun-10 | 1 | 1.40 | -1.40 |
| Mar-13 | Apr-13 | 2 | 1.36 | -1.26 | Aug-10 | Sep-10 | 2 | 2.41 | -1.64 |
| Dec-13 | Jan-14 | 2 | 1.46 | -1.19 | Nov-10 | Jan-11 | 3 | 1.83 | -1.07 |
| Apr-14 | Jul-14 | 4 | 5.18 | -1.55 | May-11 | Nov-11 | 7 | 3.33 | -1.36 |
| Sep-14 | Sep-14 | 1 | 1.90 | -1.90 | Mar-12 | Mar-12 | 1 | 1.82 | -1.82 |
| Feb-15 | Feb-15 | 1 | 1.28 | -1.28 | Jul-12 | Oct-12 | 4 | 3.16 | -1.80 |
| May-15 | Mar-16 | 11 | 11.33 | -2.32 | Dec-12 | Jan-13 | 2 | 1.92 | -1.17 |
| Aug-16 | Aug-16 | 1 | 1.23 | -1.23 | Apr-13 | Apr-13 | 1 | 1.68 | -1.68 |
|  |  |  |  |  | Aug-14 | Mar-15 | 8 | 6.28 | -2.28 |
|  |  |  |  |  | Aug-15 | Jul-16 | 12 | 10.59 | -1.71 |
